# Supplementary material for: Hydroxylation of benzophenone with ammonium phosphomolybdate in the solid state via UV photoactivation
Source: Royal Society of Chemistry journal article supplement (doi:10.1039/b905718h), 2009-01-01

## Electronic Supplementary Information

### Hydroxylation of Benzophenone with Ammonium Phosphomolybdate in the Solid State via UV Photoactivation

Mrinmoyee Basu<sup>§</sup>, Suresh Sarkar<sup>§</sup>, Surojit Pande<sup>§</sup>, Subhra Jana<sup>§</sup>, Arun Kumar Sinha<sup>§</sup>,  
Sougata Sarkar<sup>§</sup>, Mukul Pradhan<sup>§</sup>, Anjali Pal<sup>‡</sup> and Tarasankar Pal<sup>§\*</sup>

<sup>§\*</sup>Department of Chemistry, <sup>‡</sup>Department of Civil Engineering, Indian Institute of Technology, Kharagpur-721302, India  
*E-mail: tpal@chem.iitkgp.ernet.in*

#### ESI 1 Schematic representation of the photochemical reaction pathway

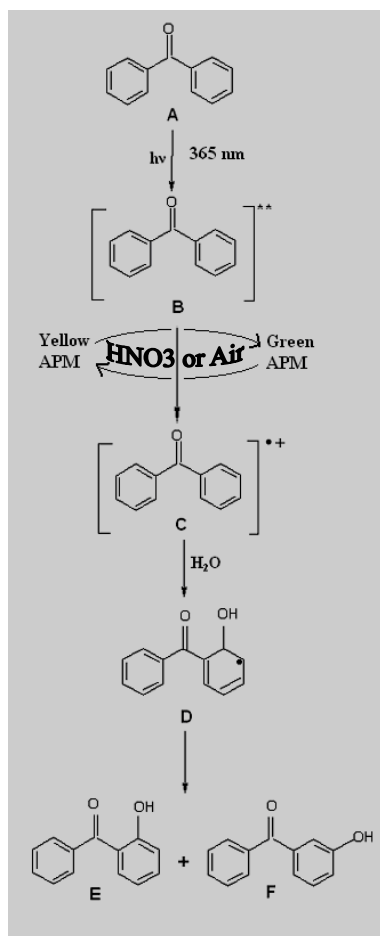

**ESI 2 FTIR spectra of benzophenone and 2-, 3- hydroxy benzophenone**

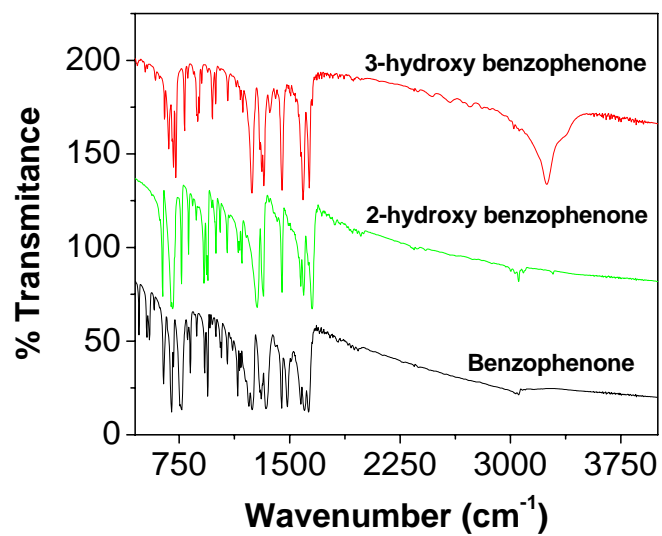

### ESI 3 GCMS spectra of 2- and 3- hydroxy benzophenone

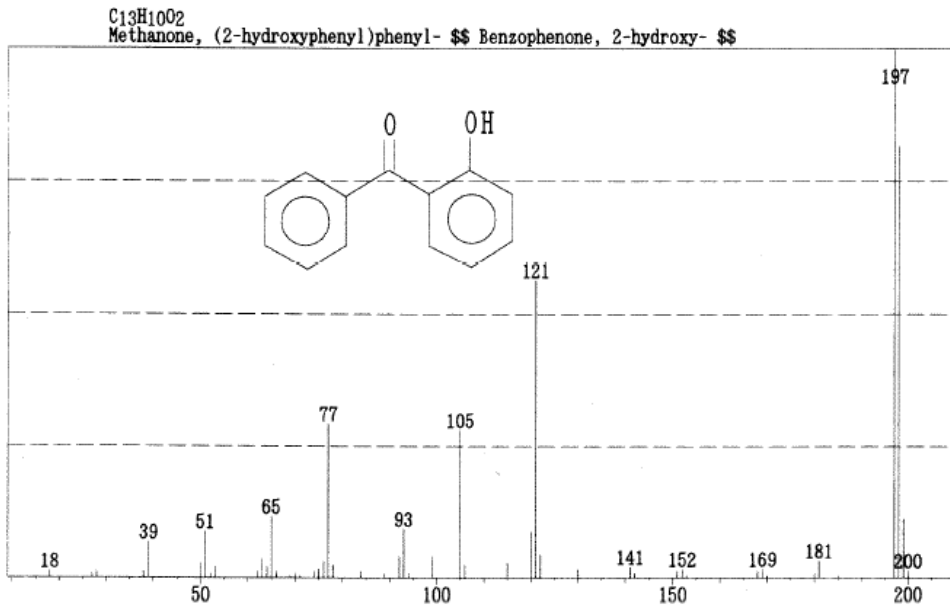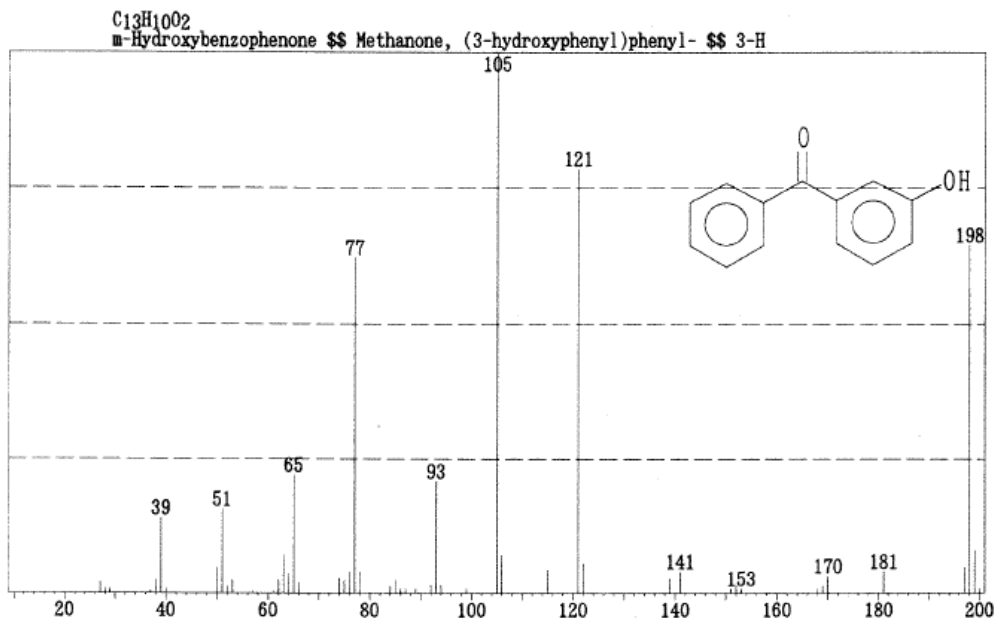

**ESI 4 EDS analysis of (a) yellow and (b) green APM i.e., before and after UV light irradiation**

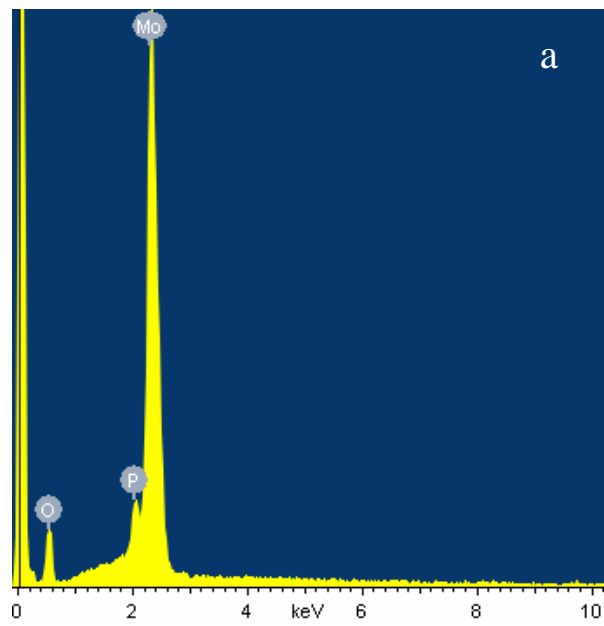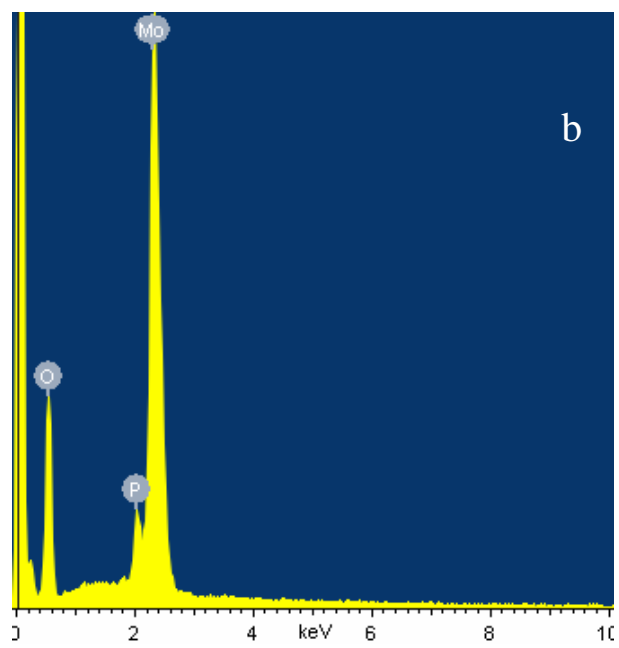

Supplement: b905718h.pdf [file b905718h.pdf]
